# Supplementary material for: Prostaglandin I2 is responsible for ameliorating prostaglandin E2 stress in stimulating the expression of tumor necrosis factor α in a β-amyloid protein -dependent mechanism
Source: PubMed Central journal article supplement (PMC5732691; doi:10.18632/oncotarget.18462), 2017-06-13
Supplement: oncotarget-08-102801-s001.pdf [file oncotarget-08-102801-s001.pdf]

## Prostaglandin I<sub>2</sub> is responsible for ameliorating prostaglandin E<sub>2</sub> stress in stimulating the expression of tumor necrosis factor $\alpha$ in a $\beta$ -amyloid protein -dependent mechanism

### SUPPLEMENTARY MATERIALS

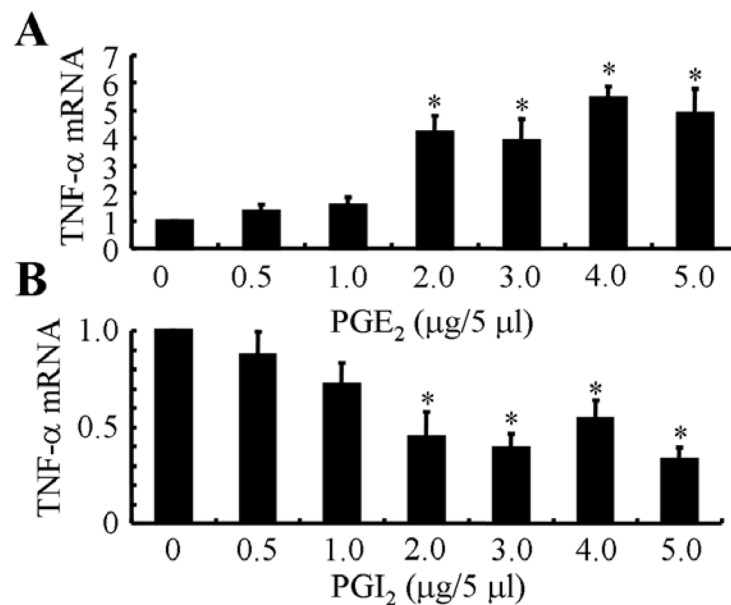

**Supplementary Figure 1: Involvement of PGE<sub>2</sub> and PGI<sub>2</sub> in opposite regulating the expression of TNF- $\alpha$  in C57BL/6 mice.** The C57BL/6 mice was injected (i.c.v) with PGE<sub>2</sub> or PGI<sub>2</sub> for 24 h before the brains were harvested. TNF- $\alpha$  mRNA level was determined by qRT-PCR. \*,  $p < 0.05$  with respect to the vehicle-treated control.
